# Supplementary material for: Synthesis of organized mesoporous metal oxide films templated by amphiphilic PVA–PMMA comb copolymer
Source: Royal Society of Chemistry journal article supplement (doi:10.1039/c6ra13844f), 2016-01-01
Supplement: c6ra13844f1.pdf [file c6ra13844f1.pdf]

## Supporting Information

# Synthesis of Organized Mesoporous Metal Oxide Films Templated by Amphiphilic PVA-PMMA Comb Copolymer

Do Hyun Kim,<sup>a</sup> Min Su Park,<sup>a</sup> Hyung Hee Cho,<sup>b</sup> Jung Tae Park<sup>\*c</sup>, Jong Hak Kim<sup>\*a</sup>

<sup>a</sup> *Department of Chemical and Biomolecular Engineering, Yonsei University, 50 Yonsei-ro, Seodaemun-gu, Seoul 03722, South Korea*

<sup>b</sup> *Department of Mechanical Engineering, Yonsei University, 50 Yonsei-ro, Seodaemun-gu, Seoul 03722, South Korea*

<sup>c</sup> *Department of Chemical Engineering, Konkuk University, 120 Neungdong-ro, Gwangjin-gu, Seoul 05029, South Korea*

\* To whom correspondence should be addressed

E-mail: [jtpark25@konkuk.ac.kr](mailto:jtpark25@konkuk.ac.kr) (J. T. Park) or [jonghak@yonsei.ac.kr](mailto:jonghak@yonsei.ac.kr) (J. H. Kim)

Fig. S1 DSC curves of PVA, PMMA, and PVA-PMMA comb copolymer.

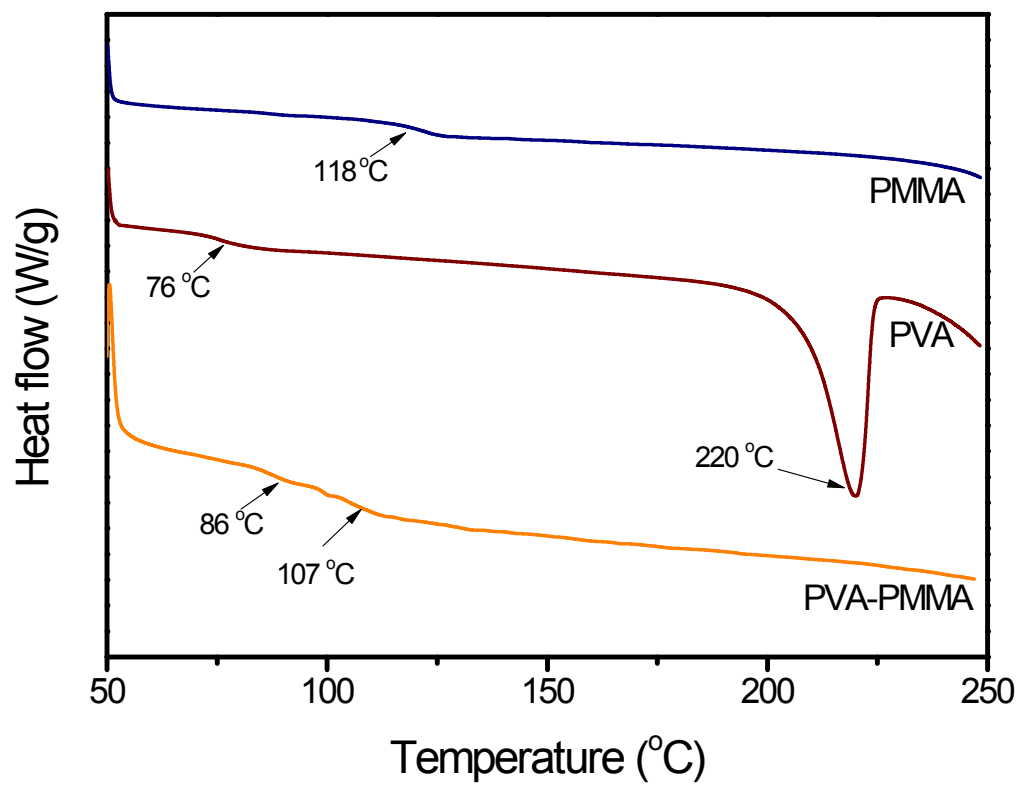

**Fig. S2** TGA curves of PVA, PMMA, and PVA-PMMA comb copolymer.

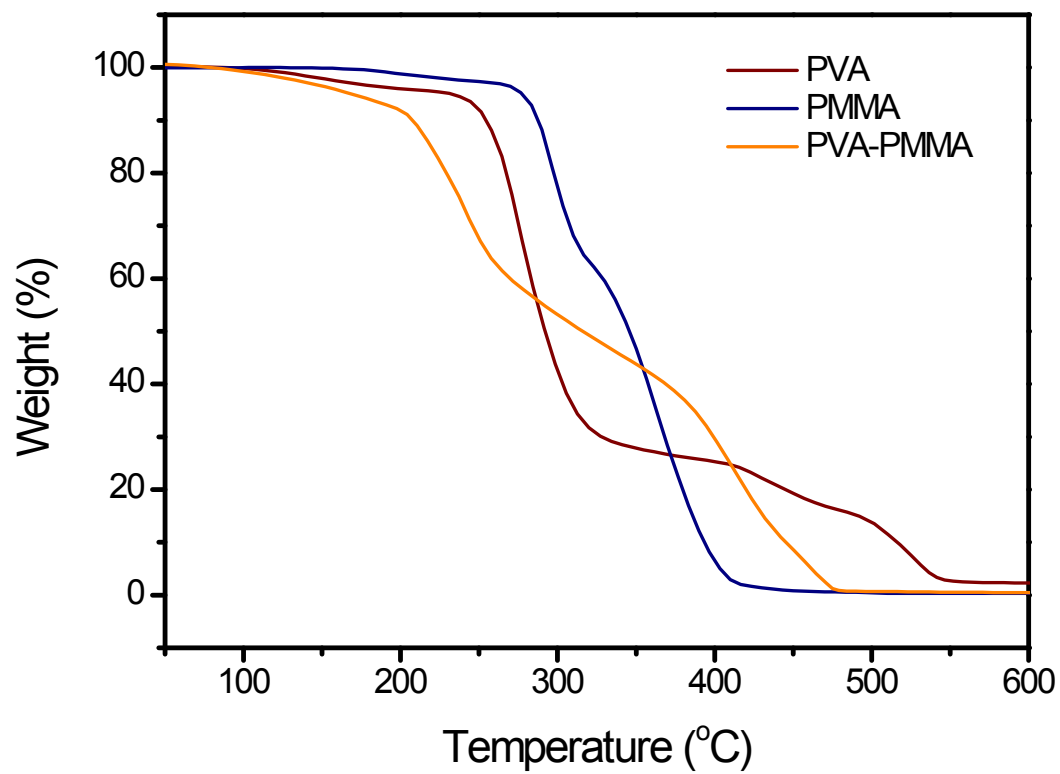

**Fig. S3** FE-SEM images of mesoporous SiO<sub>2</sub> prepared using different PVA-PMMA concentrations at low and high magnification: (a, b) 1%, (c, d) 3%, and (e, f) 5%.

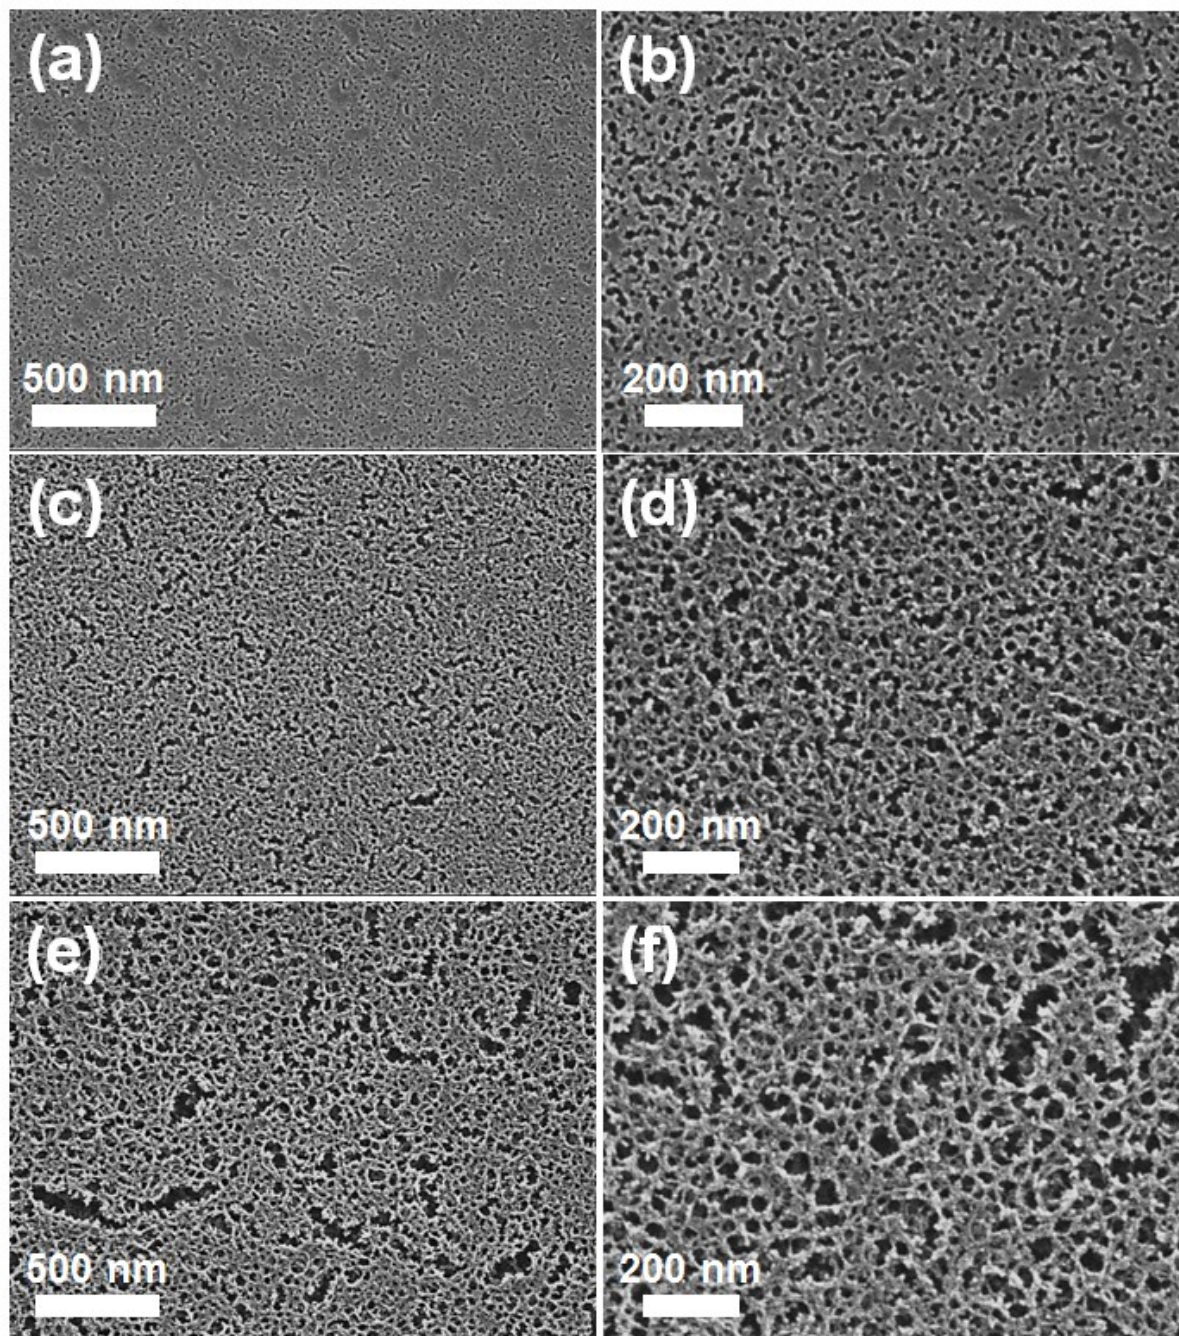

**Fig. S4** FE-SEM images of mesoporous  $\text{Al}_2\text{O}_3$  prepared using different PVA-PMMA concentrations at low and high magnification: (a, b) 1%, (c, d) 3%, and (e, f) 5%.

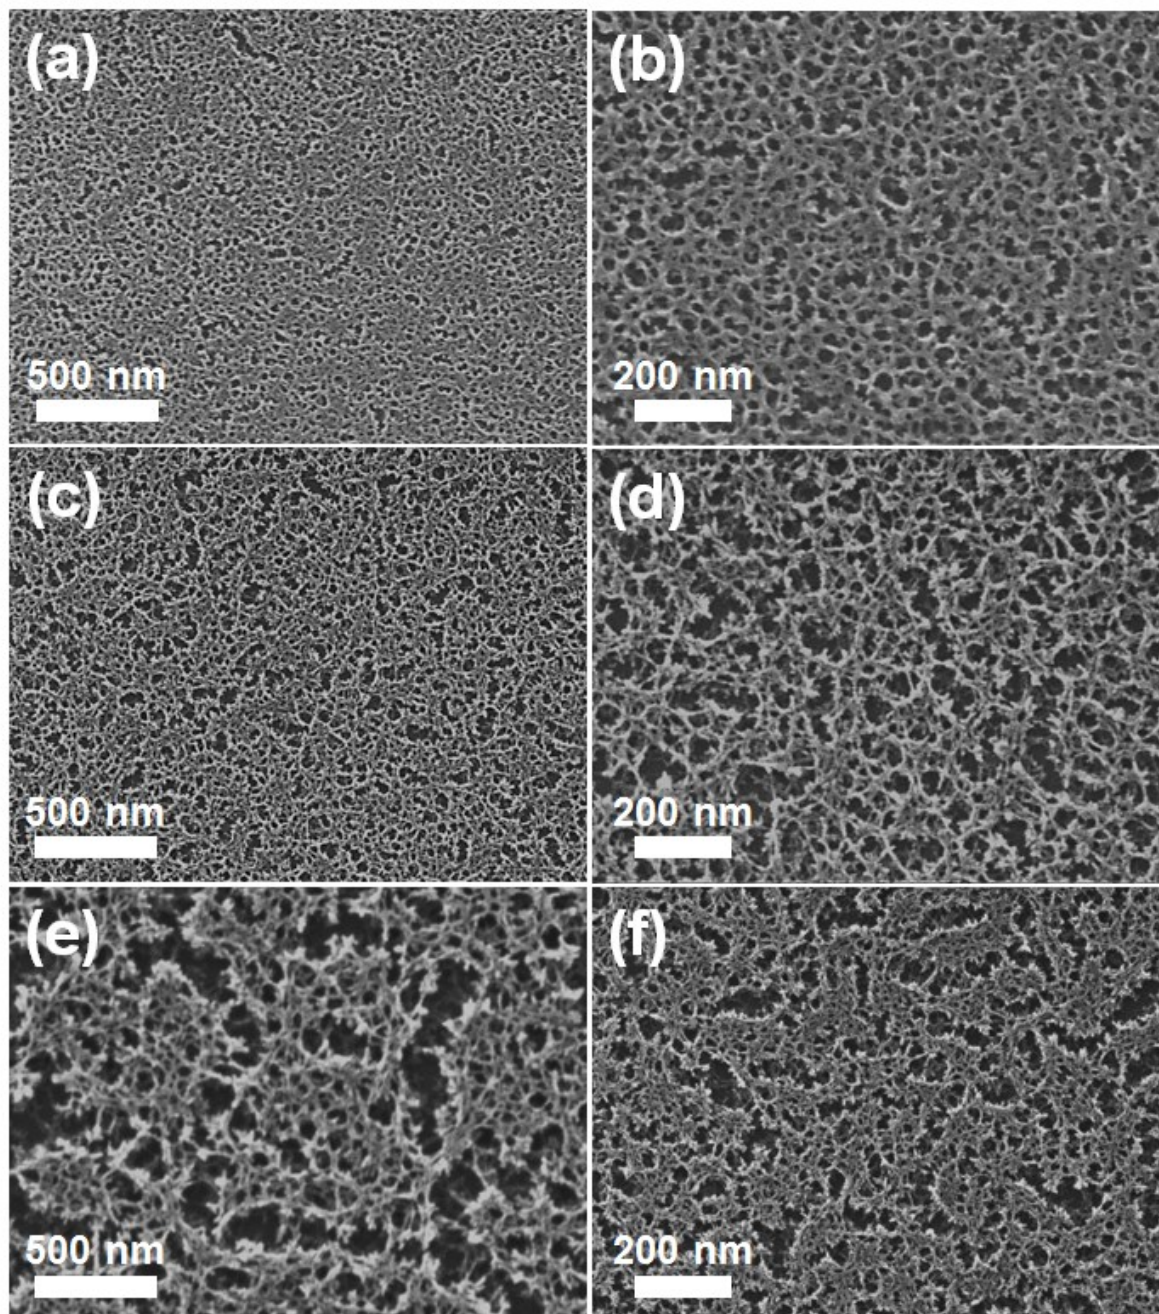

**Fig. S5** FE-SEM images of mesoporous  $\text{ZrO}_2$  prepared using constant PVA-PMMA concentration and different volumes of precursor solution at low and high magnification: (a, b) 0.2 ml, (c, d) 0.6 ml, and (e, f) 1.0 ml.

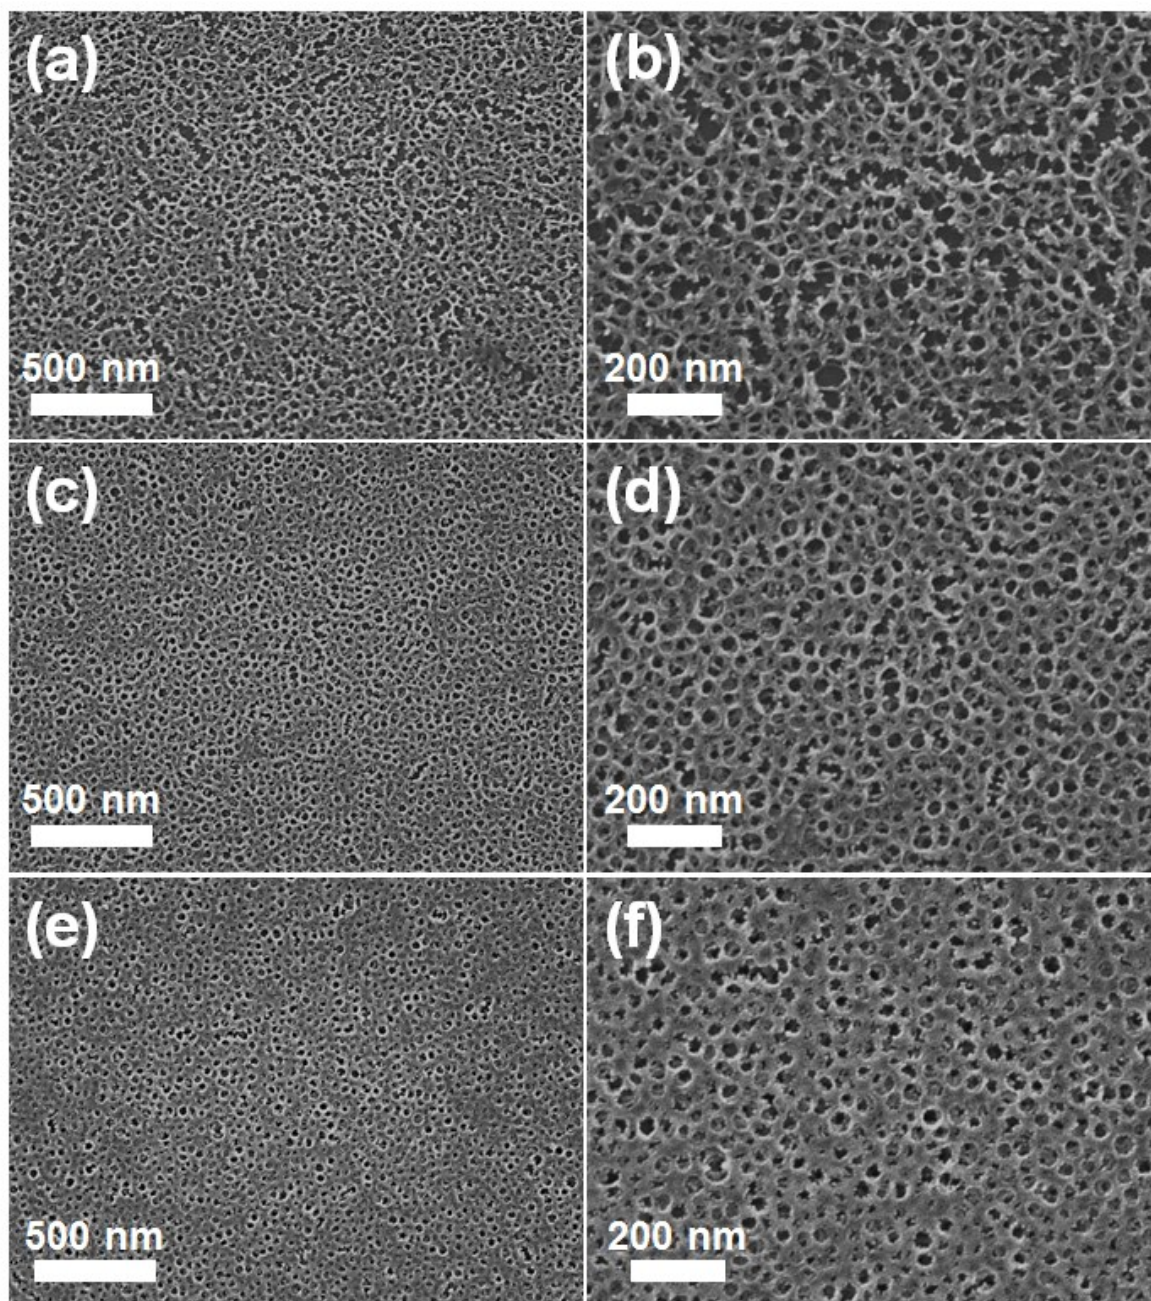

**Fig. S6** Photographs of mesoporous metal oxide films, (a)  $\text{SiO}_2$ , (b)  $\text{Al}_2\text{O}_3$ , and (c)  $\text{ZrO}_2$ .

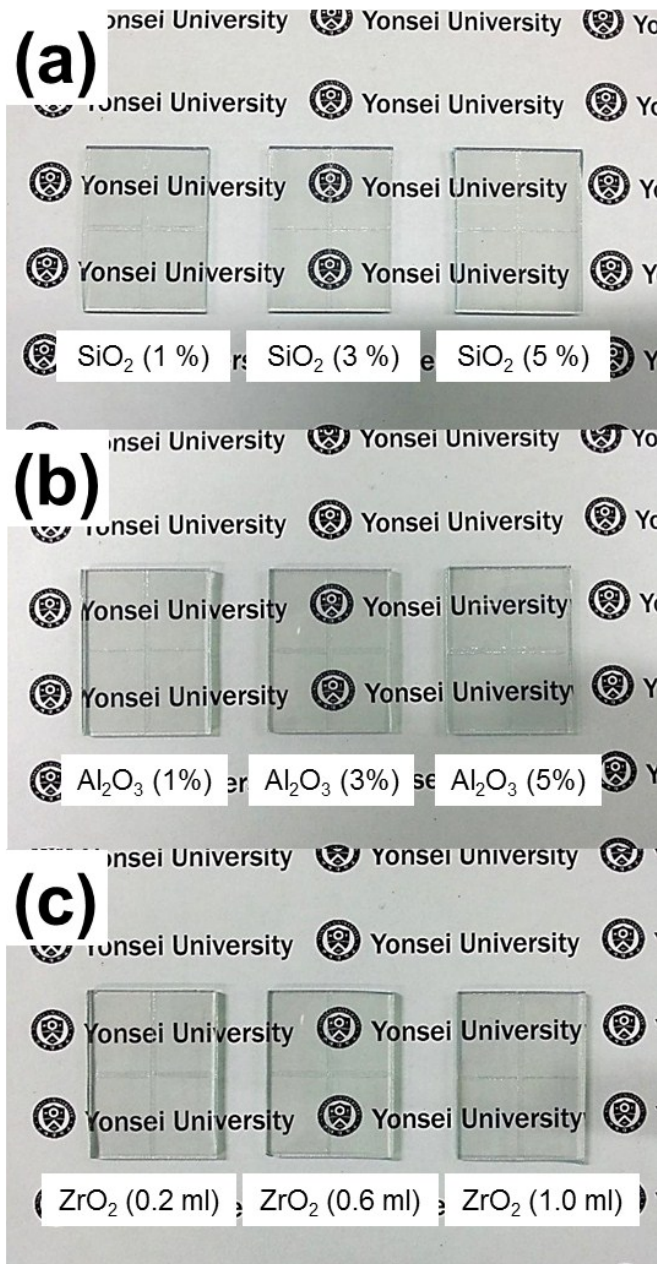

**Fig. S7** FE-SEM images of mesoporous SnO<sub>2</sub> prepared using different PVA-PMMA concentrations at low and high magnifications: (a, b) 1%, (c, d) 3%, and (e, f) 5%.

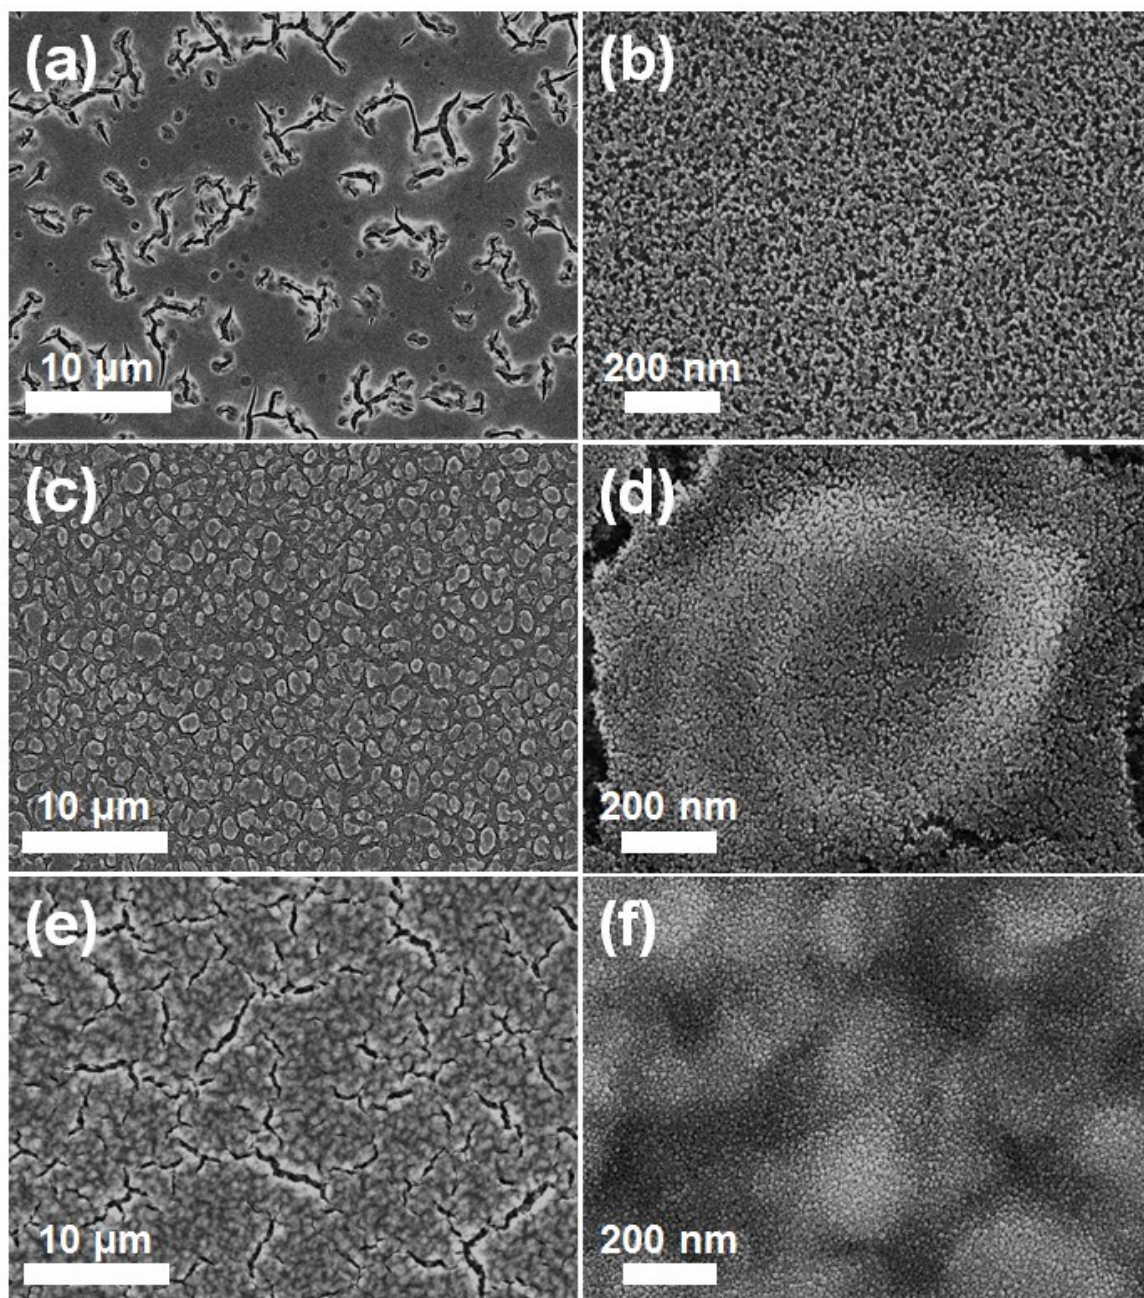



**Fig. S8** FE-SEM images of mesoporous  $\text{Fe}_2\text{O}_3$  prepared using constant PVA-PMMA concentration and different volumes of precursor solution at low and high magnifications: (a, b) 0.2 ml, (c, d) 0.6 ml, and (e, f) 1.0 ml.

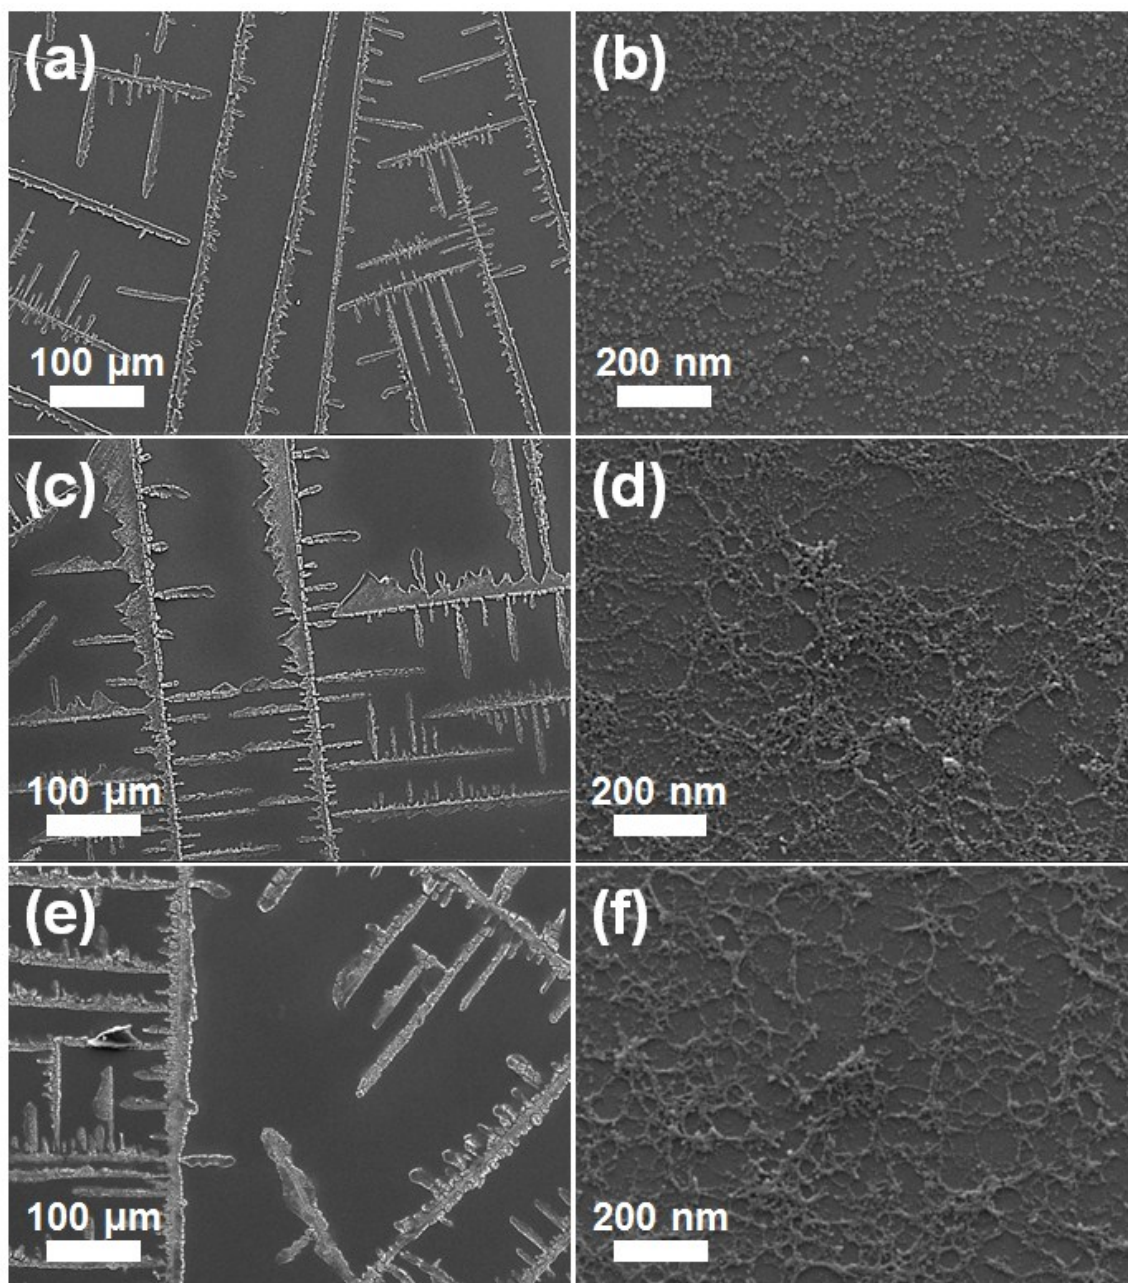

**Fig. S9** FE-SEM images of mesoporous ZnO prepared using a constant PVA-PMMA concentration and different volumes of precursor solution at low and high magnifications: (a, b) 0.2 ml, (c, d) 0.6 ml, and (e, f) 1.0 ml.

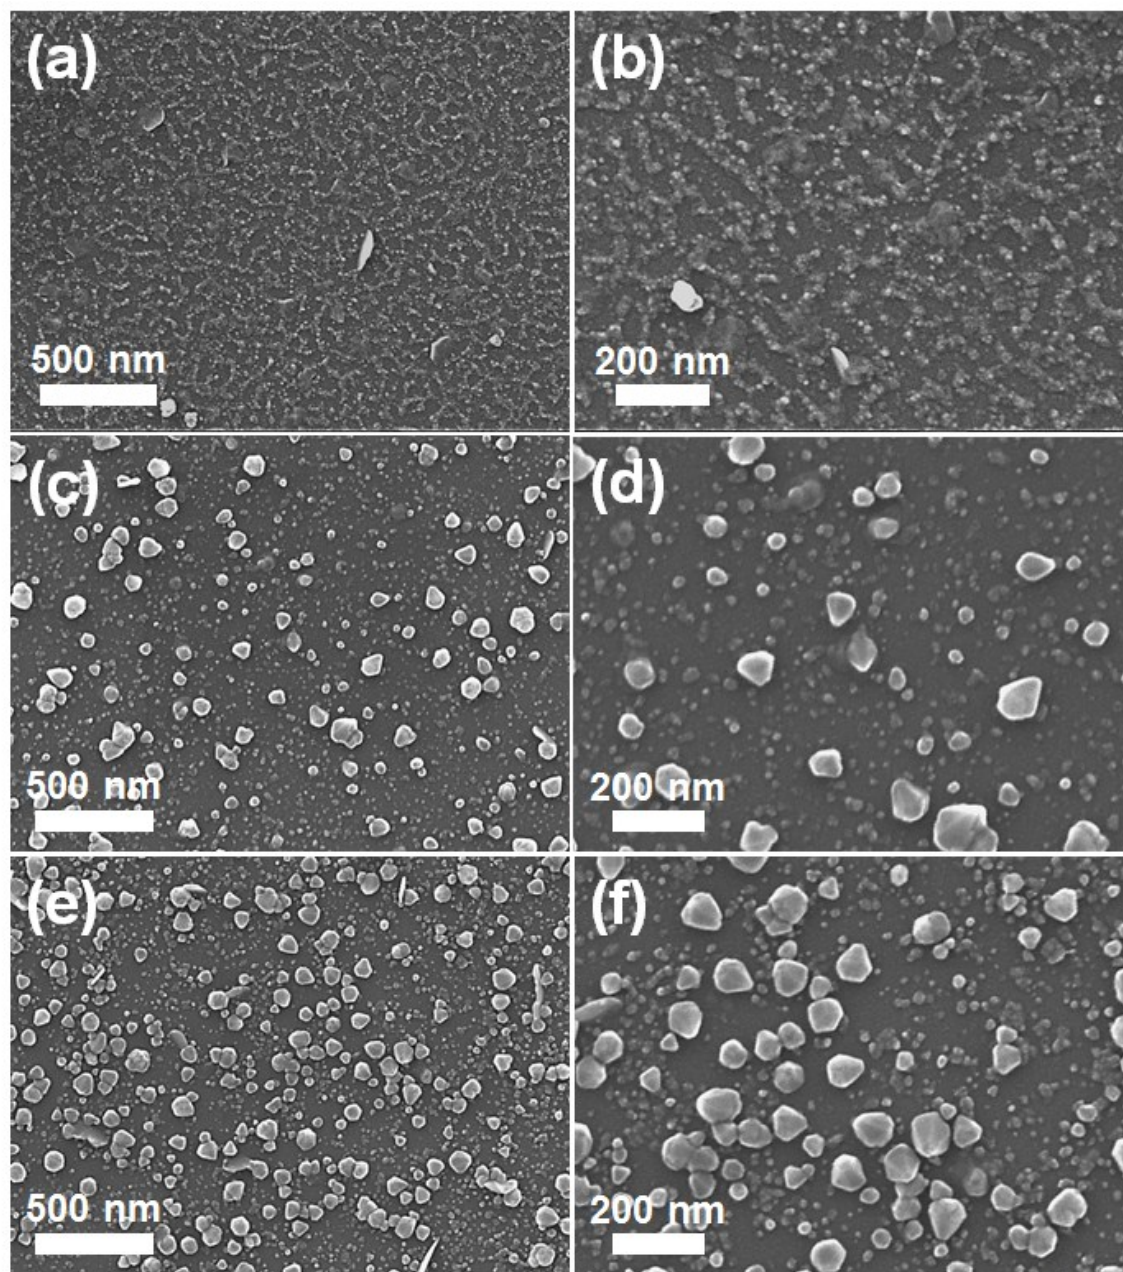

**Fig. S10** Photographs of mesoporous metal oxide films: (a)  $\text{SnO}_2$ , (b)  $\text{Fe}_2\text{O}_3$ , and (c)  $\text{ZnO}$ .

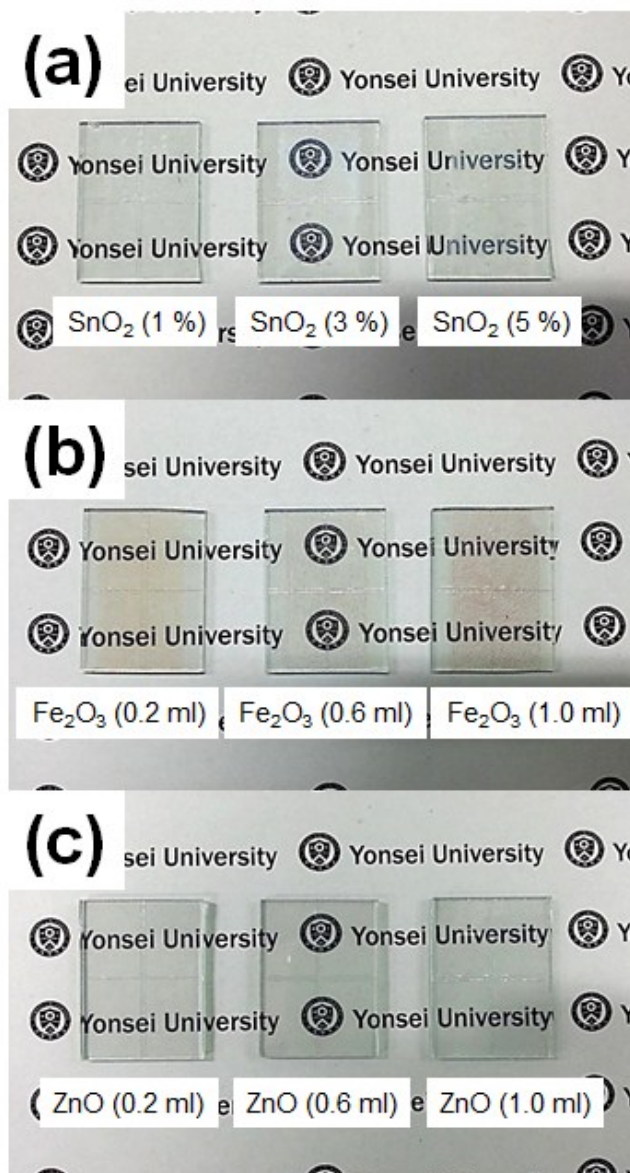

**Table S1.** Characteristic FT-IR absorption bands for PVA-PMMA/metal precursor hybrids.

| Metal precursor | Wavenumber   |              |           |           |
|-----------------|--------------|--------------|-----------|-----------|
|                 | (bond)       |              |           |           |
| Ti              | 1636         | 990          | 938       |           |
|                 | (Ti-OH)      | (Ti-O)       | (Ti-OH)   |           |
| Si              | 1060         | 952          |           |           |
|                 | (Si-O-Si)    | (Si-OH)      |           |           |
| Al              | 1007         | 957          | 544       |           |
|                 | (Al-O)       | (Al-OH)      | (Al-OH)   |           |
| Zr              | 1647         | 1555         | 995       | 631       |
|                 | (Zr-OH)      | (Zr-O-C)     | (Zr-O)    | (Zr-O-Zr) |
| Sn              | 1035         | 987          | 904       |           |
|                 | (Sn-OH)      | (Sn-O-Sn)    | (Sn-O-Sn) |           |
| Fe              | 930          |              |           |           |
|                 | (Fe-OH)      |              |           |           |
| Zn              | 2847         | 1066, 1023   | 890       | 659–544   |
|                 | (C-H of TEA) | (C-N of TEA) | (Zn-OH)   | (Zn-O)    |
